# Supplementary material
Source: PubMed Central journal article supplement (PMC6251595)
Supplement: dyv016_Supp.pdf [file dyv016_Supp.pdf]

**Appendix 1.** Hispanic American participation in prospective cohort studies in the U.S., by size (largest to smallest)

| <b>Cohort</b>                                                        | <b>Authors, Year</b>          | <b>Focus</b>                                                                                    | <b>Location</b>                  | <b>Population</b>                                                               | <b># subjects</b>              | <b>Biological samples (n)</b>                                                 |
|----------------------------------------------------------------------|-------------------------------|-------------------------------------------------------------------------------------------------|----------------------------------|---------------------------------------------------------------------------------|--------------------------------|-------------------------------------------------------------------------------|
| Kaiser Permanente Southern California (KPSC) Children's health study | Koebnick C, et al., 2007      | Childhood obesity                                                                               | Southern California              | Multi-ethnic, children aged 2-19                                                | 920 034 (approx. 50% Hispanic) | None                                                                          |
| The Multiethnic Cohort                                               | Henderson BE, et al., 1993    | Diet and cancer                                                                                 | Hawaii, California               | Latino, African-American, Japanese-American, Native Hawaiian, NHW               | 215 000 (47 438 Latino)        | Blood, Urine (~15 427 Latino samples)*                                        |
| California Teacher's Study                                           | Bernstein L, et al., 2002-    | Current and former public school teachers and administrators                                    | California                       | Non-Hispanic whites, African-American, Hispanic, Asian and Pacific Island women | 133 479 (~5% Hispanic)         | Blood, Saliva (~2000 samples)*                                                |
| California Men's Health Study                                        | Caan, et al., 2000            | Prostate cancer                                                                                 | California                       | Hispanics, Blacks, whites, aged 45 to 69                                        | 84 170 (11 428 Latinos)        | None                                                                          |
| Health and Retirement Study                                          | Weir DR, et al., 1992         | Health, retirement, aging                                                                       | National                         | Multi-ethnic, over age 50 (oversampling of Hispanics)                           | >37 000 (approx. 9% Hispanic)  | Blood, Saliva (~1405 samples)*                                                |
| Mano A Mano cohort study                                             | Chow W, Wu X, et al, 2001-    | Role of genetic, acculturation and sociodemographic factors in cancer and chronic disease       | Houston, Texas                   | Mexican-Americans                                                               | 25 483 MAs                     | Blood, saliva, and urine (56%, 63% and 43% of all participants, respectively) |
| Diabetes Study of Northern California (DISTANCE)                     | Moffet HH, et al., 2005       | Diabetes                                                                                        | Northern California              | Multi-ethnic, aged 30-75                                                        | 20 188 (3717 Latinos)          | None                                                                          |
| Hispanic Community Health Study/ Study of Latinos                    | Aviles-Santa L, et al., 2008- | Prevalence and development of disease in Hispanics/Latinos, role of acculturation, risk factors | Bronx, Chicago, Miami, San Diego | Hispanic/ Latinos, aged 18 to 74 years                                          | 16 415                         | Blood, urine (15 643 samples)                                                 |
| Dallas Heart Study                                                   | Victor RG, Hobbs HH, 2000     | Cardiovascular health                                                                           | Dallas County, Texas             | Blacks, non-Hispanic whites, Hispanics, aged 18 to 65                           | 6101 (approx. 14% Hispanic)    | Blood, urine (~475 participants aged 30-65)*                                  |

|                                                                                     |                                        |                                                           |                                                       |                                                                                       |                     |                                  |
|-------------------------------------------------------------------------------------|----------------------------------------|-----------------------------------------------------------|-------------------------------------------------------|---------------------------------------------------------------------------------------|---------------------|----------------------------------|
| Northern Manhattan Study                                                            | Elkind M, et al., 1993                 | Stroke                                                    | Northern Manhattan                                    | Hispanic, black, white                                                                | 4400                | Blood                            |
| San Antonio Heart Study                                                             | Stern M, Lorenzo C, et al., 1979, 1988 | Diabetes and Cardiovascular Disease                       | San Antonio                                           | Mexican Americans and non-Hispanic whites, aged 25-64 years                           | 3301 MAs            | Blood                            |
| Hispanic Established Populations for the Epidemiology Study of the Elderly (HEPESE) | Markides KS, et al., 1993              | Physical and health conditions in older Mexican-Americans | Arizona, California, Colorado, New Mexico, Texas      | Mexican-Americans, aged 65 and older                                                  | 3050                | None                             |
| Life After Cancer Epidemiology Study (LACE)                                         | Caan B, Sternfeld B, et al., 2000      | Breast cancer survivors                                   | Northern California, Utah                             | Multi-ethnic, diagnosed with breast cancer, aged 18-79                                | 2321 (6% Hispanic)  | None                             |
| Lovelace Smokers Cohort                                                             | Tesfaigzi Y, 2000                      | COPD, lung cancer                                         | New Mexico                                            | Hispanic, NHW, smokers aged 40-75                                                     | 2300 (369 Hispanic) | DNA (307 samples)                |
| Cameron County Hispanic Cohort                                                      | Fisher-Hoch SP, et al., 2003           | Obesity, diabetes                                         | Texas                                                 | Mexican Americans, aged 18 and older                                                  | 2000                | Blood (1847 participants)        |
| Texas Harris Alzheimer's Research Study                                             | O'Bryant SE, et al., 2009              | Alzheimer's disease                                       | Texas                                                 | Patients with AD and mild cognitive impairment; large % Mexican-American participants | 2000                | Blood                            |
| Boston Area Community Health survey                                                 | Piccolo RS, et al., 2002               | Minority health, urologic signs/symptoms, type 2 diabetes | Boston                                                | Multi-ethnic                                                                          | 1876 Hispanic       | Blood (68% of all subjects), DNA |
| Sacramento Area Latino Study on Aging                                               | Gonzalez HM, et al., 1998              | Mortality, dementia                                       | California                                            | Mexican Americans, aged 60 or older                                                   | 1789                | None                             |
| Multi-ethnic Study of Atherosclerosis                                               | Olson J, et al., 2000                  | Cardiovascular disease                                    | NY, Baltimore, Chicago, LA, Minnesota, North Carolina | Multi-ethnic (22% Hispanic), aged 45-84                                               | 1496                | Blood, urine (1496 samples)      |
| Latina Gestational Diabetes Study/                                                  | Chasan-Taber L, et                     | Gestational diabetes                                      | Massachusetts                                         | Puerto Rican, Dominican, pregnant                                                     | 1231                | Blood                            |

|                                                                    |                                                |                                                         |                   |                                                                           |                     |                                 |
|--------------------------------------------------------------------|------------------------------------------------|---------------------------------------------------------|-------------------|---------------------------------------------------------------------------|---------------------|---------------------------------|
| Proyecto Buena Salud                                               | al.,2000, 2006                                 |                                                         |                   | women, aged 16-40                                                         |                     |                                 |
| Viva la Familia Study                                              | Butte NF, et al., 2000                         | Childhood obesity                                       | Texas             | Hispanic children                                                         | 1030                | Blood (1030)                    |
| IRAS/ IRAS Family Study                                            | Bergman RN, Wagenknecht LE, et al., 1992, 1999 | Insulin Resistance, Atherosclerosis, Visceral Adiposity | multi-center      | African American, Hispanic, non-Hispanic white, aged 18-81                | 1000                | Blood, urine                    |
| SUNSHINE cohort (follow up of SHINE 4-Corners Breast Cancer Study) | Sedjo RL, et al., 2007                         | Breast cancer, women's health                           | Arizona, Colorado | Non-Hispanic whites, Hispanics                                            | 650 (204 Hispanics) | None                            |
| Project FRONTIER (Cochran County Aging Study)                      | O'Bryant SE, Lambert M, et al., 2008           | Aging, cognitive health, rural health                   | Texas             | Multiethnic rural adults aged 40 and above                                | 519 (235 Hispanics) | Blood                           |
| San Antonio Longitudinal Study of Aging                            | Gonzalez H, et al., 1992-                      | Mortality, Aging                                        | San Antonio       | Mexican Americans, European Americans, aged 65 to 80                      | 394 MAs             | None                            |
| Hispanic Chronic Renal Insufficiency Cohort Study                  | Lash JP, et al., 2005-2008                     | Chronic Kidney Disease                                  | Chicago           | Mexican American, Puerto Rican, other Latin American, aged 21-74 with CKD | 327 MAs             | Blood, urine (327 samples each) |

Note. \* indicates approximate amounts based on reported percentages of Hispanic or Latino in the cohort
